# Supplementary material for: Outcomes among inpatients with cirrhosis and Clostridioides difficile infection in the modern era: results from an analysis of the National Inpatient Sample
Source: PubMed Central journal article supplement — Ann Gastroenterol. 2021 Jun 14;34(5):721–7. doi: 10.20524/aog.2021.0646 (PMC8375645; doi:10.20524/aog.2021.0646), 2021-06-14
Supplement: AnnGastroenterol-34-721_Suppl1.pdf [file AnnGastroenterol-34-721_Suppl1.pdf]

## Supplementary material

**Supplementary Table 1** The International Classification of Diseases, 10th revision, (ICD-10) diagnostic and procedural codes used to generate search results

|                                         |                                                                                                                                                                                                   |
|-----------------------------------------|---------------------------------------------------------------------------------------------------------------------------------------------------------------------------------------------------|
| <i>Clostridioides difficile</i> colitis | A04.7                                                                                                                                                                                             |
| Sepsis                                  | R65.10, R65.11, R65.20                                                                                                                                                                            |
| Shock                                   | R65.21; R57.1; R57.8; R57.9                                                                                                                                                                       |
| Acute kidney injury                     | N17.0; N17.1; N17.2; N17.8; N17.9                                                                                                                                                                 |
| Mechanical ventilation (A)              | 5A1935Z; 5A1945Z; 5A1955Z                                                                                                                                                                         |
| Vasopressor use (B)                     | 3E030XZ; 3E033XZ; 3E040XZ; 3E043XZ; 3E050XZ; 3E053XZ; 3E060XZ; 3E063XZ                                                                                                                            |
| Liver cirrhosis                         | K70.3; K70.30; K70.31; K74.3; K74.4; K74.5; K74.6; K74.60; K74.69; K76.6; K76.7; K76.81; K72.1; K72.10; K72.11; I85.0; I85.00; I85.01; C22.0; C22.8; K65.2; K72.10; K72.11; I86.4; I85.01; I85.11 |
| Portal hypertension                     | K70.31; K76.6; K76.7; K76.81; I85.0; I85.00; I85.01; I86.4; I85.01; K65.2                                                                                                                         |

A+B, intensive care unit admission
